# Supplementary material for: Intra‐ and extra‐cranial BCOR‐ITD tumours are separate entities within the BCOR ‐rearranged family
Source: PubMed Central journal article supplement — J Pathol Clin Res. 2022 Feb 17;8(3):217–32. doi: 10.1002/cjp2.255 (PMC8977275; doi:10.1002/cjp2.255), 2022-02-17
Supplement: CJP2-8-217-s006.pdf [file CJP2-8-217-s006.pdf]

**Intra- and extra-cranial *BCOR*-ITD tumours are separate entities within the *BCOR*-rearranged family**

Y Bouchoucha, A Tauziède-Espariat, A Gauthier *et al. J Pathol Clin Res* DOI: 10.1002/cjp.2.255

**Table S4. Immunohistochemistry results**

The table shows all immunohistochemistry performed on 23 samples, using antibodies classically used in neuro-oncopathology and antibodies classically used in sarcoma pathology. CNS tumours are identified in light grey and sarcomas in dark grey. EGFR score was assessed on a scale from 0 to 300 (percentage of positive cells x staining intensity) with intensity scored as follows: 0, absent; 1, weak; 2, mild; 3, strong. The cut-off value for overexpression was considered more than or equal to 150.

|     | BCOR | GFAP    | Olig2     | EMA     | Neurofilament 70 | Synaptophysin | Chromogranin A | NeuN | Vimentin | CD56 | CD34 | Actin | Myogénin | Desmin | Cytokératin AE1/AE3 | Cytokeratin 18 | EGFR | p53 | Nuclear $\beta$ -catenin | GAB1 | YAP1 | INI1 | H3K27Me3 | PTEN | BCOR | SATB2 | RO | Cyclin D1 | CD34 | TLE1 | NTRK | BCL2 | Desmin | CD10 | Caldesmon  | BCL6              | INI1         | WT1 |  |  |
|-----|------|---------|-----------|---------|------------------|---------------|----------------|------|----------|------|------|-------|----------|--------|---------------------|----------------|------|-----|--------------------------|------|------|------|----------|------|------|-------|----|-----------|------|------|------|------|--------|------|------------|-------------------|--------------|-----|--|--|
| P11 | +    | + focal | + focal   | -       | +                | -             |                | +    | +        | +    | -    | -     | -        | -      | -                   | -              | 300  | -   | -                        | +    | +    | +    | +        | -    | +    | +     | -  | +         | +    | +    | +    | -    | +      | -    | -          |                   |              |     |  |  |
| P13 | +    | + focal | -         | -       | +                | -             |                | +    | +        | +    | -    | -     | -        | -      | -                   | -              | 300  | +   | -                        | +    | +    | +    | +        | -    | +    | +     | -  | +         | +    | +    | +    | -    | +      | -    | -          | + very weak focal |              |     |  |  |
| P20 | +    | -       | -         | -       | -                |               |                | -    |          |      |      |       |          |        |                     |                | 270  | -   | -                        | -    | +    | +    | +        | +    | +    | +     | -  | +         | +    | +    | +    | +    | -      | +    | weak focal | -                 | -            |     |  |  |
| P21 | +    | -       | + diffuse | + focal | +                | -             |                | +    | +        | +    | -    | -     | -        | -      | -                   | -              | 300  | -   | -                        | +    | +    | +    | +        | -    | +    | +     | -  | +         | +    | +    | +    | +    | -      | -    | -          | -                 | -            |     |  |  |
| P22 | +    | + focal | -         | -       | +                | -             |                | +    | +        | +    | -    | -     | -        | -      | -                   | -              | 300  | -   | -                        | +    | +    | +    | +        | -    | +    | +     | -  | +         | +    | +    | +    | +    | +      | -    | -          | -                 | + weak focal |     |  |  |
| P30 | +    | + focal | + diffuse | -       | +                | -             | -              | +    | +        | +    | -    | -     | -        | -      | -                   | -              | 300  | -   | -                        | -    | +    | +    | +        | -    | +    | +     | -  | +         | +    | +    | +    | +    | +      | -    | -          | -                 | -            |     |  |  |

|      |     |   |         |           |   |   |   |   |   |   |   |   |   |   |   |   |   |     |   |   |   |   |   |   |   |   |   |   |   |   |   |   |   |   |   |   |   |   |   |              |              |   |   |   |   |
|------|-----|---|---------|-----------|---|---|---|---|---|---|---|---|---|---|---|---|---|-----|---|---|---|---|---|---|---|---|---|---|---|---|---|---|---|---|---|---|---|---|---|--------------|--------------|---|---|---|---|
|      | P31 | + | + focal | -         | - | + | - | - | + | + | + | - | - | - | - | - | - | 300 | - | - | - | + | + | + | - | + | + | - | + | + | + | - | + | + | - | + | - | + | - | + weak focal |              |   |   |   |   |
|      | P32 | + | + focal | + partial | - | - | - | - | + | + | + | - | - | - | - | - | - | 300 | - | - | + | + | + | + | - | + | + | - | + | - | + | + | + | - | + | - | + | - | + |              |              |   |   |   |   |
|      | P33 | + | -       | + partial | - | - | - | - | + | + | + | - | - | - | - | - | - | 270 | - | - | + | + | + | + | - | + | + | - | + | - | + | + | + | - | + | - | - | - | + | -            | + weak focal |   |   |   |   |
| CCSK | P24 |   | -       | -         |   | - |   |   |   |   |   |   |   |   |   |   |   | 0   |   |   | - | + |   |   |   |   | + | + | - | + | - | + | - | + | - | + | - | - | - | -            |              |   |   |   |   |
|      | P25 |   | -       | -         |   | - |   |   |   |   |   |   |   |   |   |   |   | 300 |   |   | - | + |   |   |   |   |   | - | - | - | + | - | - | - | - | + | - | + | - | -            | +            | - |   |   |   |
|      | P26 |   | -       | -         |   | - |   |   |   |   |   |   |   |   |   |   |   | 40  |   |   | + | + |   |   |   |   | + | + | - | + | - | + | - | + | - | + | - | + | - | +            | -            | + | - |   |   |
|      | P27 |   |         |           |   |   |   |   |   |   |   |   |   |   |   |   |   |     |   |   |   |   |   |   |   |   | + | + | - | + | - | + | - | + | - | + | - | + | - | +            | -            | + | - |   |   |
| ESS  | P17 |   | -       | -         |   | - |   |   |   |   |   |   |   |   |   |   |   | 0   |   |   | - | + |   |   |   |   | + | + | - | + | - | + | - | + | - | + | - | + | - | +            | -            | + | - |   |   |
|      | P19 |   | -       | -         |   | - |   |   |   |   |   |   |   |   |   |   |   | 50  |   |   | - | + |   |   |   |   | + | + | - | + | - | + | - | + | - | + | - | + | - | +            | -            | + | - | + | - |
| URCS | P1  |   | -       | -         |   | - |   |   |   |   |   |   |   |   |   |   |   | 30  |   |   | + | - |   |   |   |   | + | + | - | + | - | + | - | + | - | + | - | + | - | +            | -            | + | - | + | - |
|      | P4  |   | -       | -         |   | - |   |   |   |   |   |   |   |   |   |   |   | 0   |   |   | - | + |   |   |   |   | + | + | - | + | - | + | - | + | - | + | - | + | - | +            | -            | + | - | + | - |
|      | P6  |   | -       | -         |   | - |   |   |   |   |   |   |   |   |   |   |   | 0   |   |   | - | + |   |   |   |   | + | + | - | + | - | + | - | + | - | + | - | + | - | +            | -            | + | - | + | - |
|      | P7  |   | -       | -         |   | - |   |   |   |   |   |   |   |   |   |   |   | 150 |   |   | - | + |   |   |   |   | + | + | - | + | - | + | - | + | - | + | - | + | - | +            | -            | + | - | + | - |
|      | P8  |   | -       | -         |   | - |   |   |   |   |   |   |   |   |   |   |   | 0   |   |   | - | + |   |   |   |   | + | + | - | + | - | + | - | + | - | + | - | + | - | +            | -            | + | - | + | - |
|      | P9  |   | -       | -         |   | - |   |   |   |   |   |   |   |   |   |   |   | 150 |   |   | - | + |   |   |   |   | + | + | - | + | - | + | - | + | - | + | - | + | - | +            | -            | + | - | + | - |
